# Supplementary material
Source: publisher figshare collection journal article supplement (https://acs.figshare.com/ndownloader/files/10290975)
Supplement: Supplementary file 1 [file 10290975]

## Supporting Information

### Highly Stable and Luminescent Perovskite-Polymer Composites from a Convenient and Universal Strategy

*Yumeng Xin<sup>1</sup>, Hongjie Zhao<sup>2</sup>, Jiuyang Zhang<sup>1\*</sup>*

<sup>1</sup>School of Chemistry and Chemical Engineering, Southeast University, Nanjing,  
211189, PR China

<sup>2</sup>School of Chemical Engineering & Technology, China University of Mining and  
Technology, Xuzhou, 221116, PR China

#### Corresponding Authors

\*E-mail: [jiuyang@seu.edu.cn](mailto:jiuyang@seu.edu.cn)

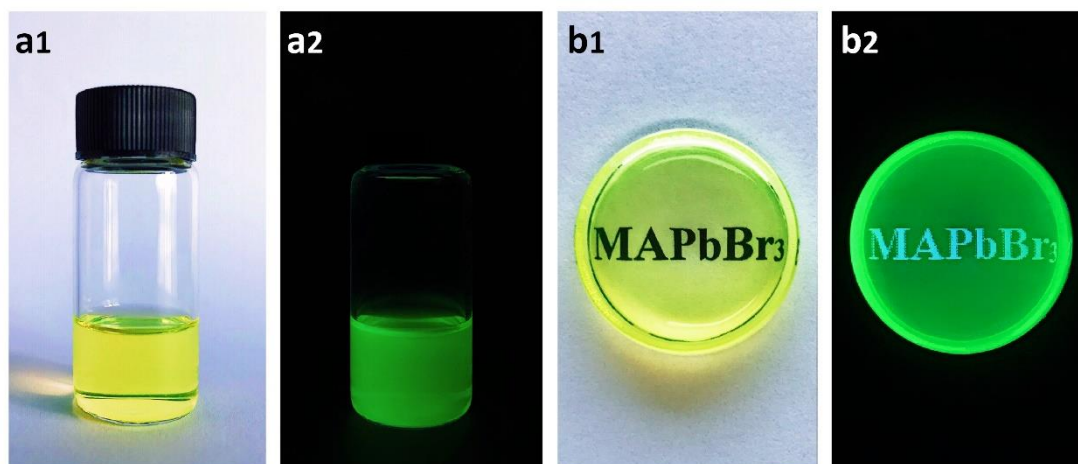

**Figure S1.** Photos in room light (a1) and in UV-illumination (a2) of methylammonium lead bromide nanoparticles ( $\text{MAPbBr}_3$ ) in bulk MMA; the photos of the polymerized  $\text{MAPbBr}_3$ -PMMA taken under room light (b1) and UV-illumination (b2).

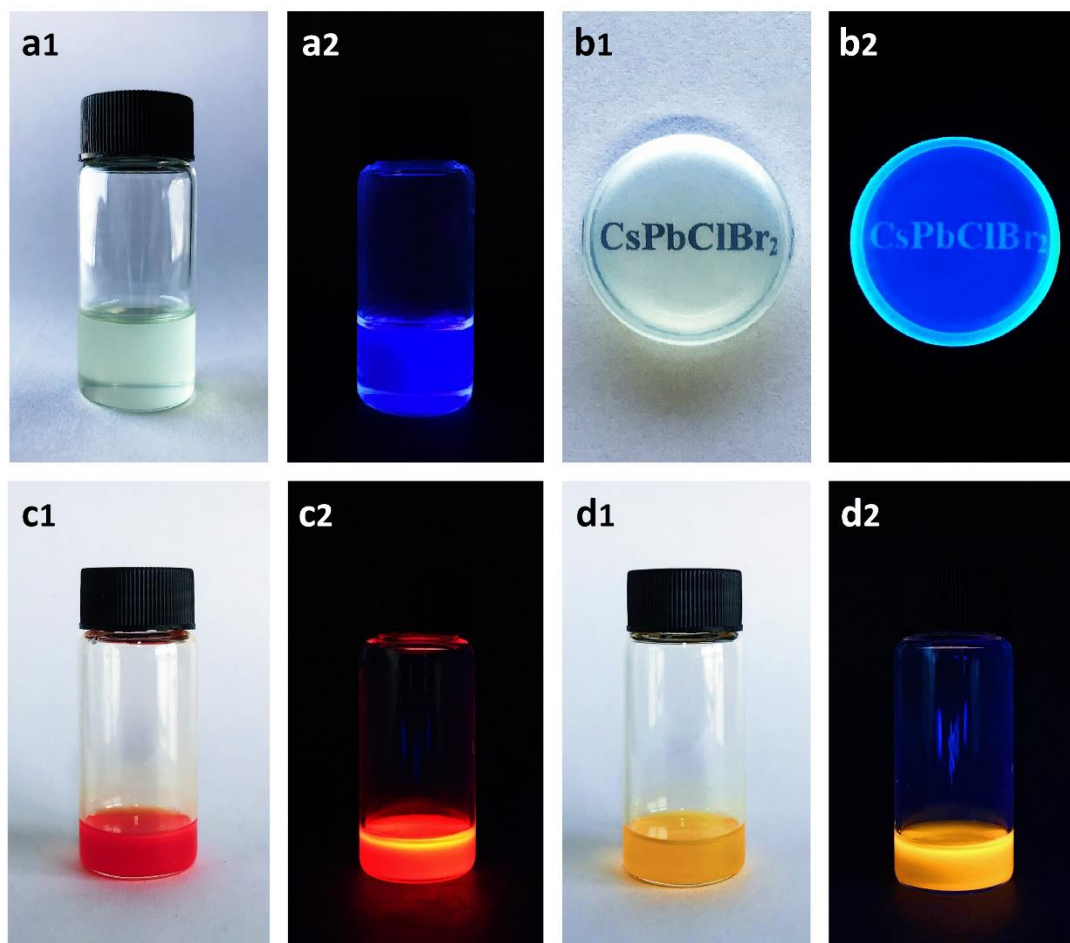

**Figure S2.** Photos in room light (a1) and UV-illumination (a2) of  $\text{CsPbClBr}_2$  inorganic perovskite quantum dots formed in bulk MMA; photos of disks (diameter: 3 cm) from  $\text{CsPbClBr}_2$ -PMMA composite under ambient room light (b1) and UV illumination (b2). Photos in room light (c1) and in UV-illumination (c2) of  $\text{CsPbBr}_{1.2}\text{I}_{1.8}$  inorganic perovskite quantum dots formed in toluene; the photos of  $\text{CsPbBr}_{1.2}\text{I}_{1.8}$  inorganic perovskite quantum dots formed in bulk MMA solution taken under room light (d1) and UV-illumination (d2).

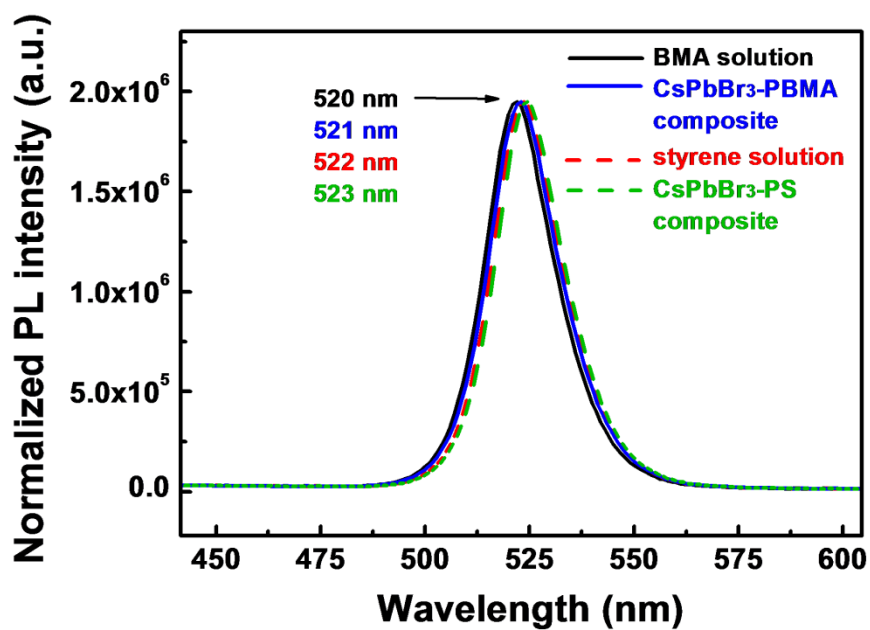

**Figure S3.** Normalized PL spectra of emissive bulk BMA/styrene solution and the resulted CsPbBr<sub>3</sub>-PBMA/CsPbBr<sub>3</sub>-PS composite.

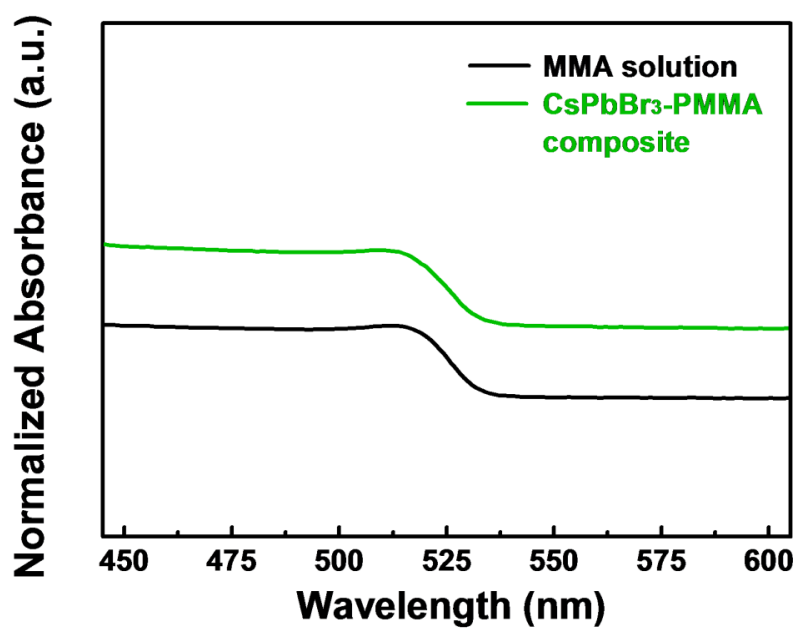

**Figure S4.** Normalized absorption spectra of emissive bulk MMA solution and the resulted CsPbBr<sub>3</sub>-PMMA composite.

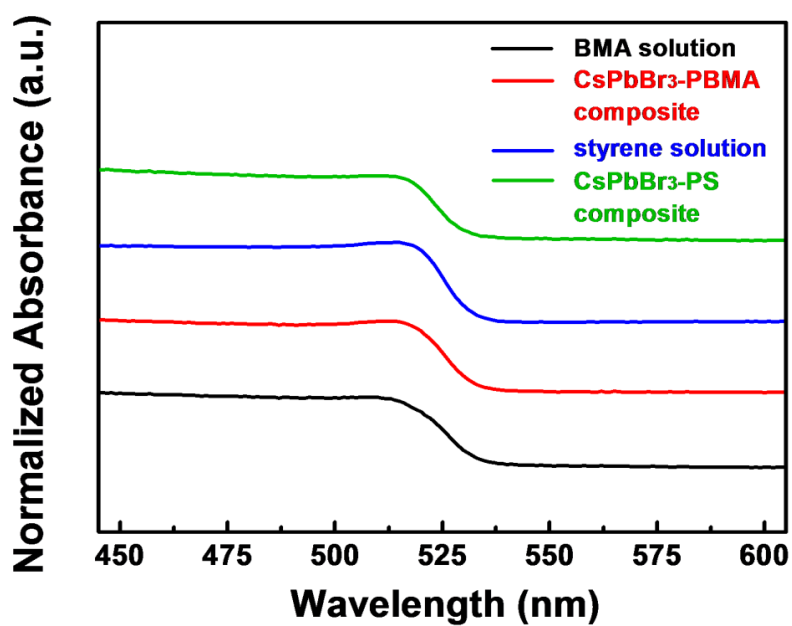

**Figure S5.** Normalized absorption spectra of emissive bulk BMA/styrene solution and the resulted CsPbBr<sub>3</sub>-PBMA/CsPbBr<sub>3</sub>-PS composite.

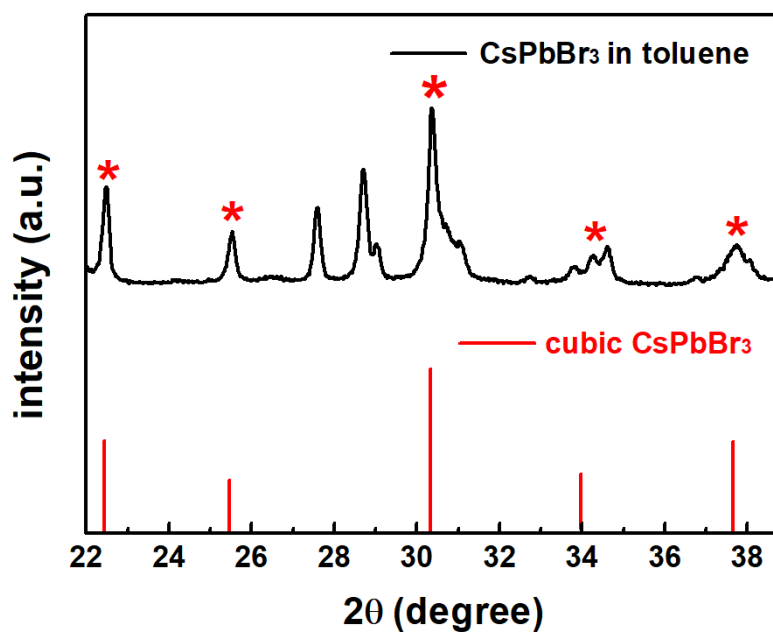

**Figure S6.** X-ray diffraction (XRD) patterns of CsPbBr<sub>3</sub> crystals obtained from toluene. The pattern is the same as CsPbBr<sub>3</sub> crystals obtained from MMA, indicating no small molecules of MMA incorporating into crystals.

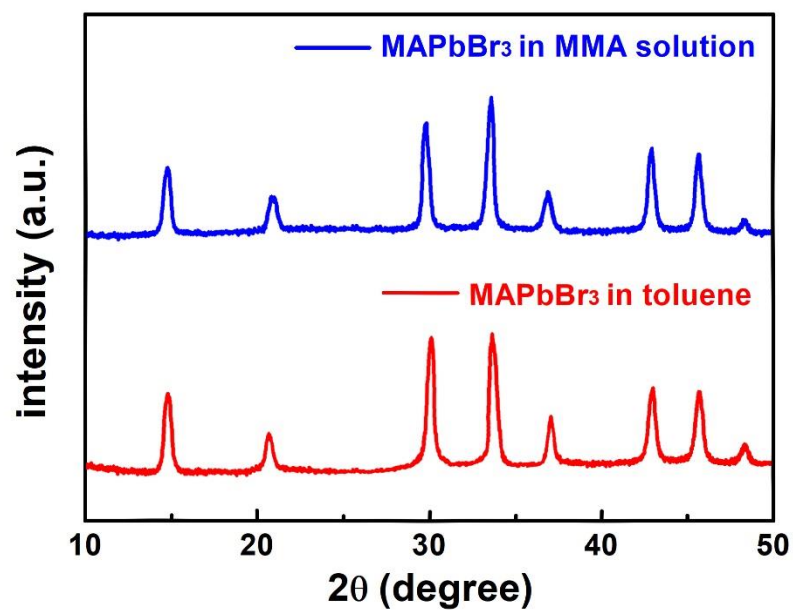

**Figure S7.** X-ray diffraction (XRD) patterns of MAPbBr<sub>3</sub> crystals obtained from emissive bulk MMA solution and toluene. No obvious change was observed of crystals from MMA and toluene.

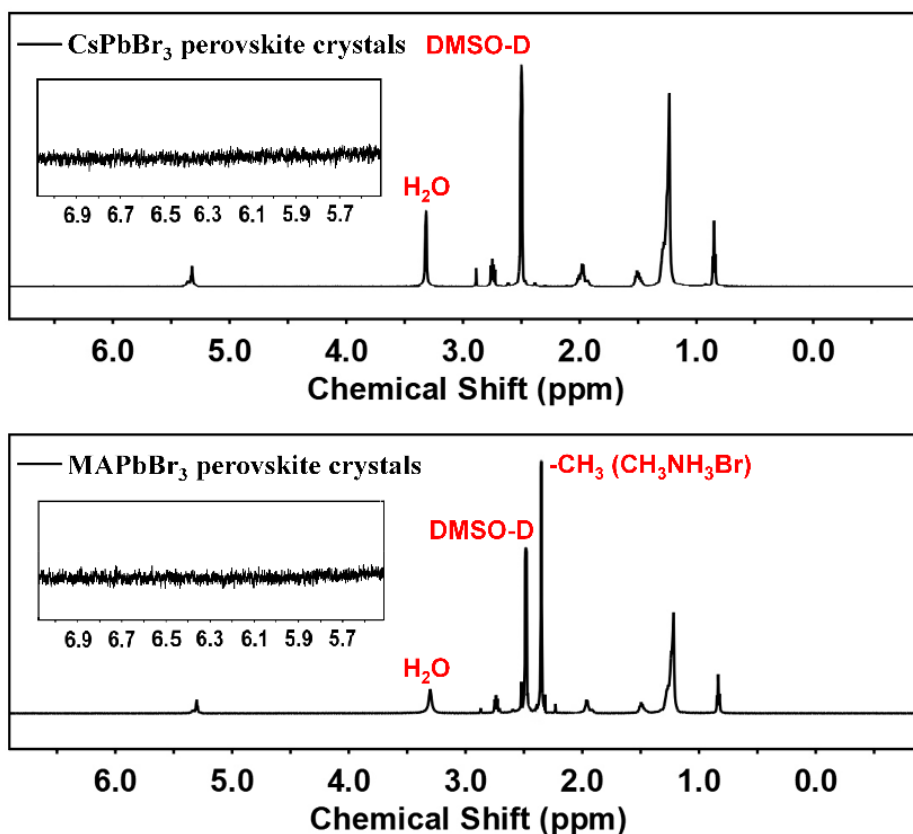

**Figure S8.**  $^1\text{H}$  NMR spectra of CsPbBr<sub>3</sub> and MAPbBr<sub>3</sub> perovskite crystals (The inset is the zoom-in spectrum displaying signals from 6.0 to 0.0 ppm). No peaks residual MMA monomer observed in the  $^1\text{H}$  NMR spectra (the signals in spectra were attributed to the oleylamine, oleic acid and methyl of CH<sub>3</sub>NH<sub>3</sub>Br, without the signals of MMA monomer.), showing that MMA did not exist in the final crystals.

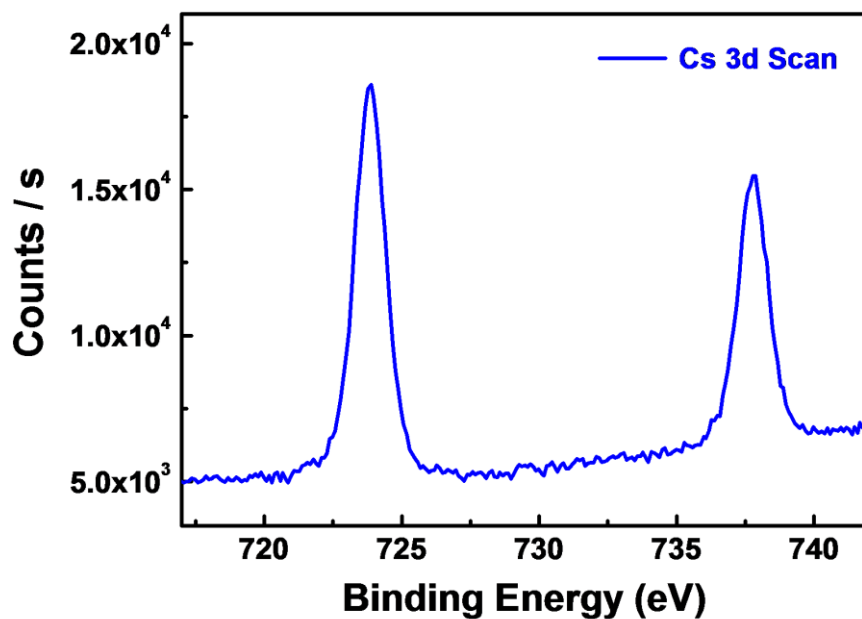

**Figure S9.** X-ray photoelectron spectroscopy of the Cs element in the resulted CsPbBr<sub>3</sub>-PMMA composite.

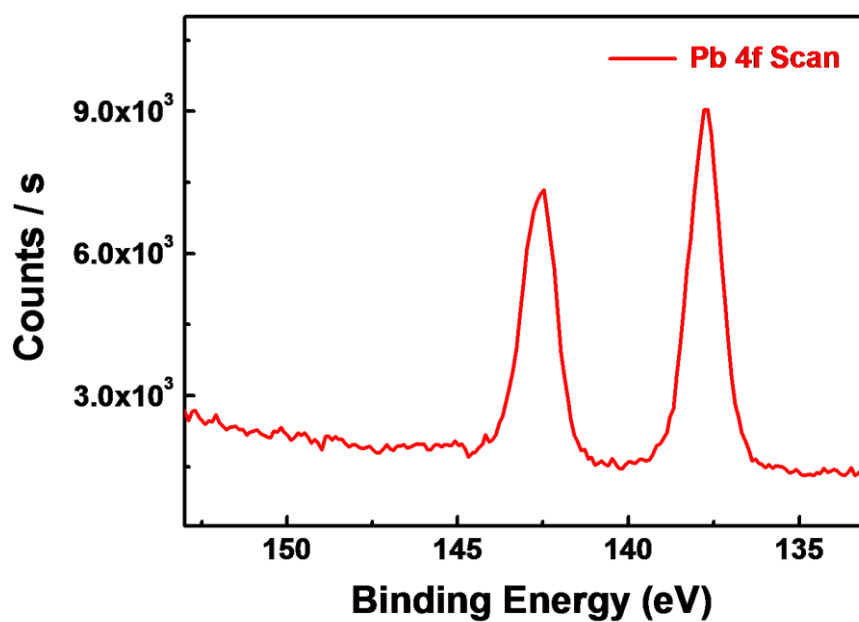

**Figure S10.** X-ray photoelectron spectroscopy of the Pb element in the resulted CsPbBr<sub>3</sub>-PMMA composite.



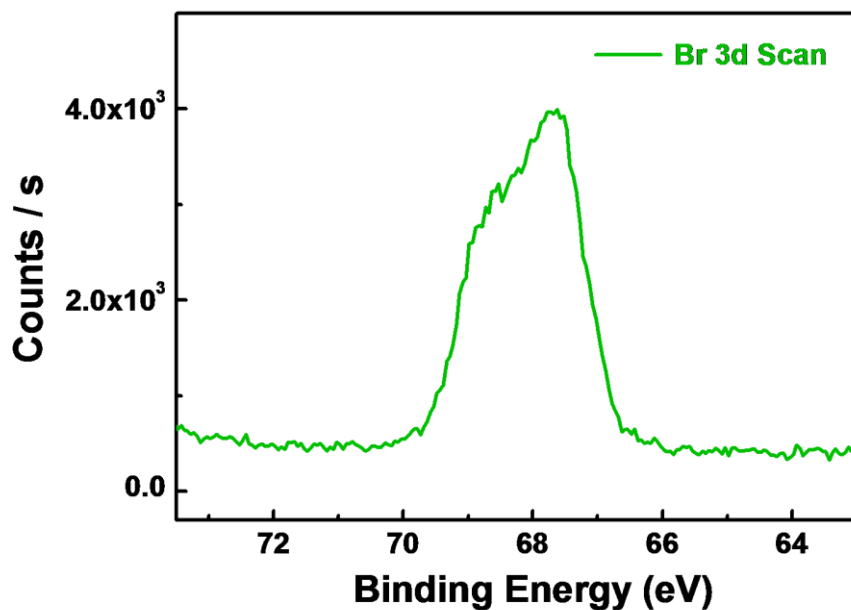

**Figure S11.** X-ray photoelectron spectroscopy of the Br element in the resulted CsPbBr<sub>3</sub>-PMMA composite. Weak peaks were observed due to the very small weight fraction of CsPbBr<sub>3</sub> in polymers.

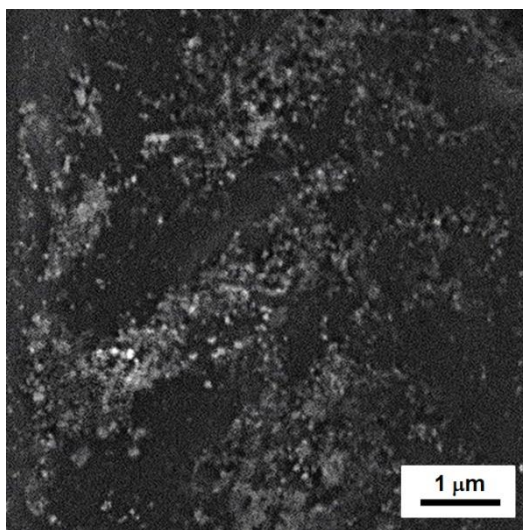

**Figure S12.** Cross-section scanning electron microscope (SEM) image for the resulted CsPbBr<sub>3</sub>-PMMA composite with high content of CsPbBr<sub>3</sub> crystals (100  $\mu$ L of the precursor solution was added into the mixture of solution with MMA (1.5 mL), EDMA (28  $\mu$ L) and TPO (5.19 mg)).

**Table S1.** Photoluminescence quantum yields (PLQYs) of the resulted CsPbBr<sub>3</sub>-PMMA composite (10-50 nm) and the resulted CsPbBr<sub>3</sub>-PMMA composite with large CsPbBr<sub>3</sub> particles (10-150 nm). The large size of CsPbBr<sub>3</sub> particles were prepared by adding 100  $\mu$ L of the precursor solution into the mixture of solution with MMA, EDMA and TPO.

| PLQYs                                                  | CsPbBr <sub>3</sub> Particles<br>(10–50 nm) | CsPbBr <sub>3</sub> Particles<br>(10–150 nm) |
|--------------------------------------------------------|---------------------------------------------|----------------------------------------------|
| The resulted<br>CsPbBr <sub>3</sub> -PMMA<br>composite | 54.6%                                       | 43.5%                                        |

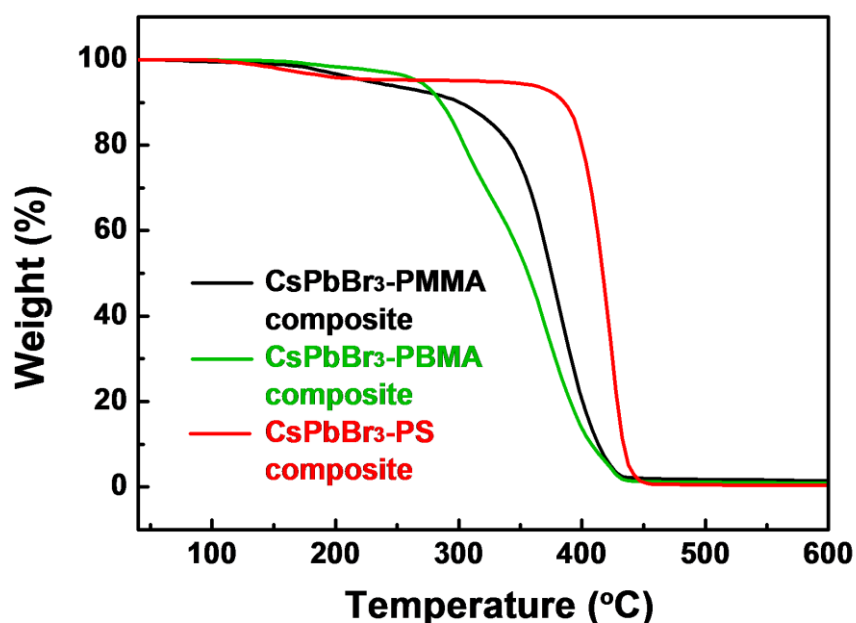

**Figure S13.** Thermal gravimetric analysis (TGA) curves of the resulted CsPbBr<sub>3</sub>-PMMA, CsPbBr<sub>3</sub>-PBMA and CsPbBr<sub>3</sub>-PS composite at a heating rate of 10  $^{\circ}\text{C min}^{-1}$  in N<sub>2</sub>.

**Table S2.** Photoluminescence quantum yields (PLQYs) of the resulted CsPbBr<sub>3</sub>-PMMA, CsPbBr<sub>3</sub>-PBMA and CsPbBr<sub>3</sub>-PS composite.

| PLQYs                                                           | PMMA  | PBMA  | PS              |
|-----------------------------------------------------------------|-------|-------|-----------------|
| <b>Thermal polymerized CsPbBr<sub>3</sub>-polymer composite</b> | 7.3%  | 9.2%  | 0.7%            |
| <b>UV-polymerized CsPbBr<sub>3</sub>-polymer composite</b>      | 54.6% | 62.2% | — <sup>a)</sup> |

a) UV-polymerized CsPbBr<sub>3</sub>-PS composite was not formed due to the low polymerization constant of styrene.

**Table S3.** Photoluminescence quantum yields (PLQYs) of the CsPbBr<sub>3</sub> crystals without TPO, CsPbBr<sub>3</sub> with TPO and CsPbBr<sub>3</sub> with TPO (under the UV-light for 1 h) in toluene (50 μL of the precursor solution was added into the mixture of solution with toluene (1.5 mL) and TPO (5.19 mg)).

| PLQYs                                         | Without TPO | With TPO | With TPO<br>(under the UV-light) |
|-----------------------------------------------|-------------|----------|----------------------------------|
| <b>CsPbBr<sub>3</sub> crystals in toluene</b> | 64.6%       | 62.2%    | 54.7%                            |

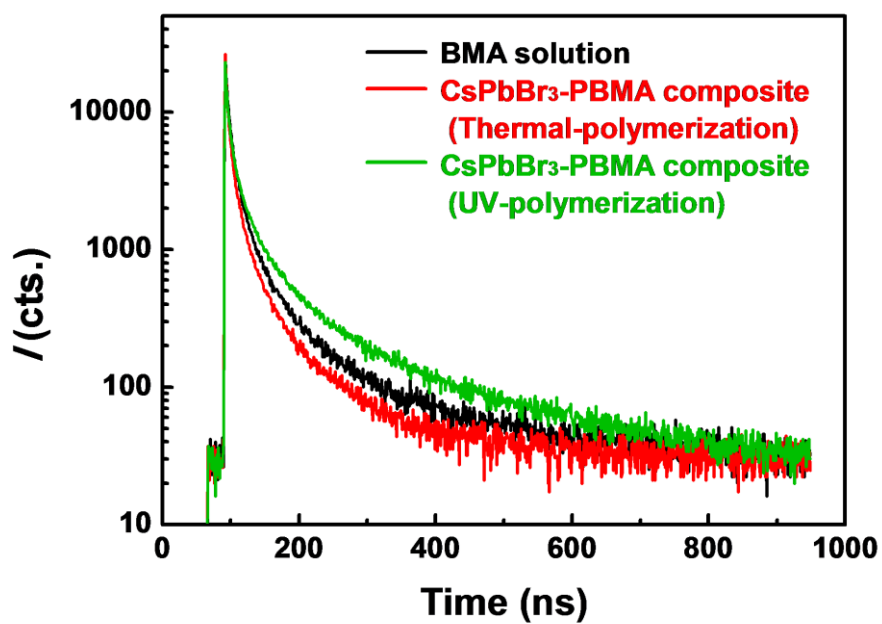

**Figure S14.** Time-resolved PL decays and fitting curves of emissive bulk BMA solutions and the resulted CsPbBr<sub>3</sub>-PBMA composite.

**Table S4.** Triexponential fitting results of emissive bulk MMA solution and the resulted CsPbBr<sub>3</sub>-PMMA composite.

| Sample                                    | MMA solution         | Thermal polymerized CsPbBr <sub>3</sub> -PMMA composite | UV-polymerized CsPbBr <sub>3</sub> -PMMA composite |
|-------------------------------------------|----------------------|---------------------------------------------------------|----------------------------------------------------|
| <b>A<sub>1</sub></b> <sup>a)</sup>        | 1.35×10 <sup>6</sup> | 2.68×10 <sup>5</sup>                                    | 5.71×10 <sup>5</sup>                               |
| <b>τ<sub>1</sub> (ns)</b> <sup>b)</sup>   | 3.0                  | 3.0                                                     | 3.5                                                |
| <b>A<sub>2</sub></b> <sup>a)</sup>        | 1.76×10 <sup>6</sup> | 4.19×10 <sup>5</sup>                                    | 6.47×10 <sup>5</sup>                               |
| <b>τ<sub>2</sub> (ns)</b> <sup>b)</sup>   | 16                   | 21.7                                                    | 20.6                                               |
| <b>τ<sub>avg</sub> (ns)</b> <sup>c)</sup> | 14.4                 | 20.2                                                    | 18.4                                               |

Time-resolved PL decay curves were fitted by a diexponential (eqs 1 and 2) function.

<sup>a)</sup> A<sub>1</sub> and A<sub>2</sub> represents weight, [A(t) = A<sub>0</sub> + A<sub>1</sub>exp-(t-t<sub>0</sub>)/τ<sub>1</sub> + A<sub>2</sub>exp-(t-t<sub>0</sub>)/τ<sub>2</sub> (eqs 1)] ;

<sup>b)</sup> τ<sub>1</sub> and τ<sub>2</sub> represents PL lifetime; <sup>c)</sup> The average lifetime were calculated using [τ<sub>avg</sub> =

(A<sub>1</sub>τ<sub>1</sub><sup>2</sup> + A<sub>2</sub>τ<sub>2</sub><sup>2</sup>)/( A<sub>1</sub>τ<sub>1</sub> + A<sub>2</sub>τ<sub>2</sub>) (eqs 2)].

**Table S5.** Triexponential fitting results of emissive bulk BMA solution and the resulted CsPbBr<sub>3</sub>-PBMA composite.

| Sample                                    | BMA solution         | Thermal polymerized CsPbBr <sub>3</sub> -PBMA composite | UV-polymerized CsPbBr <sub>3</sub> -PBMA composite |
|-------------------------------------------|----------------------|---------------------------------------------------------|----------------------------------------------------|
| <b>A<sub>1</sub></b> <sup>a)</sup>        | 4.32×10 <sup>5</sup> | 1.27×10 <sup>6</sup>                                    | 1.92×10 <sup>4</sup>                               |
| <b>τ<sub>1</sub> (ns)</b> <sup>b)</sup>   | 3.9                  | 3.0                                                     | 4.0                                                |
| <b>A<sub>2</sub></b> <sup>a)</sup>        | 2.23×10 <sup>5</sup> | 1.41×10 <sup>6</sup>                                    | 7.74×10 <sup>4</sup>                               |
| <b>τ<sub>2</sub> (ns)</b> <sup>b)</sup>   | 25.6                 | 18.2                                                    | 35.4                                               |
| <b>τ<sub>avg</sub> (ns)</b> <sup>c)</sup> | 20.7                 | 16.2                                                    | 34.5                                               |

Time-resolved PL decay curves were fitted by a diexponential (eqs 1 and 2) function.

<sup>a)</sup> A<sub>1</sub> and A<sub>2</sub> represents weight, [A(t) = A<sub>0</sub> + A<sub>1</sub>exp-(t-t<sub>0</sub>)/τ<sub>1</sub> + A<sub>2</sub>exp-(t-t<sub>0</sub>)/τ<sub>2</sub> (eqs 1)] ;

<sup>b)</sup> τ<sub>1</sub> and τ<sub>2</sub> represents PL lifetime; <sup>c)</sup> The average lifetime were calculated using [τ<sub>avg</sub> = (A<sub>1</sub>τ<sub>1</sub><sup>2</sup> + A<sub>2</sub>τ<sub>2</sub><sup>2</sup>)/(A<sub>1</sub>τ<sub>1</sub> + A<sub>2</sub>τ<sub>2</sub>) (eqs 2)].

**Table S6.** Triexponential fitting results of emissive bulk styrene solution and the resulted CsPbBr<sub>3</sub>-PS composite.

| Sample                              | Styrene solution     | Thermal polymerized CsPbBr <sub>3</sub> -PS composite |
|-------------------------------------|----------------------|-------------------------------------------------------|
| A <sub>1</sub> <sup>a)</sup>        | 9.14×10 <sup>4</sup> | 2.143×10 <sup>6</sup>                                 |
| τ <sub>1</sub> (ns) <sup>b)</sup>   | 5.2                  | 4.5                                                   |
| A <sub>2</sub> <sup>a)</sup>        | 6.33×10 <sup>4</sup> | 1.76×10 <sup>6</sup>                                  |
| τ <sub>2</sub> (ns) <sup>b)</sup>   | 37.9                 | 17.8                                                  |
| τ <sub>avg</sub> (ns) <sup>c)</sup> | 32.5                 | 14.7                                                  |

Time-resolved PL decay curves were fitted by a diexponential (eqs 1 and 2) function.

<sup>a)</sup> A<sub>1</sub> and A<sub>2</sub> represents weight, [A(t) = A<sub>0</sub> + A<sub>1</sub>exp-(t-t<sub>0</sub>)/τ<sub>1</sub> + A<sub>2</sub>exp-(t-t<sub>0</sub>)/τ<sub>2</sub> (eqs 1)] ;

<sup>b)</sup> τ<sub>1</sub> and τ<sub>2</sub> represents PL lifetime; <sup>c)</sup> The average lifetime were calculated using[τ<sub>avg</sub> = (A<sub>1</sub>τ<sub>1</sub><sup>2</sup> + A<sub>2</sub>τ<sub>2</sub><sup>2</sup>)/( A<sub>1</sub>τ<sub>1</sub> + A<sub>2</sub>τ<sub>2</sub>) (eqs 2)].

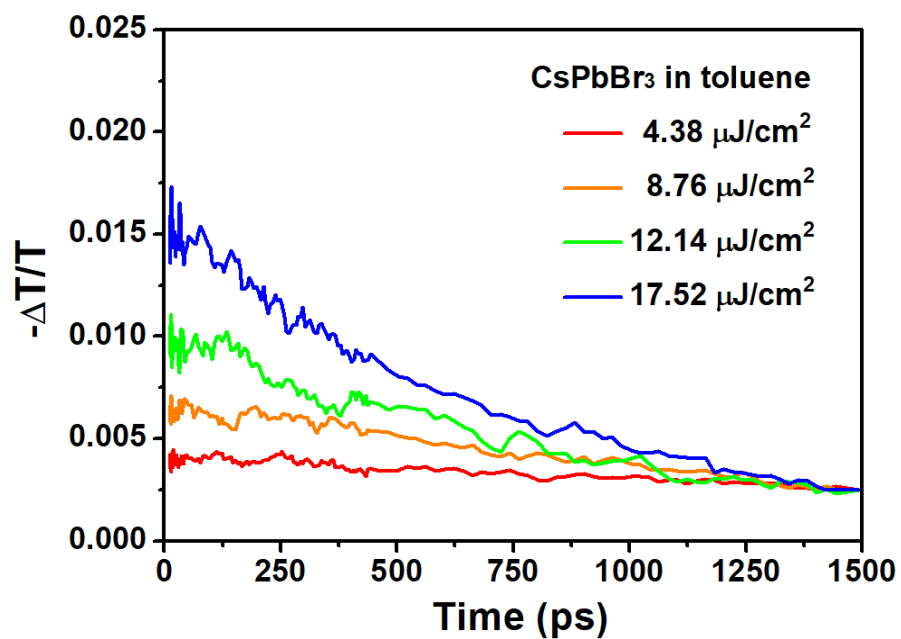

**Figure S15.** TA spectra of CsPbBr<sub>3</sub> in toluene.

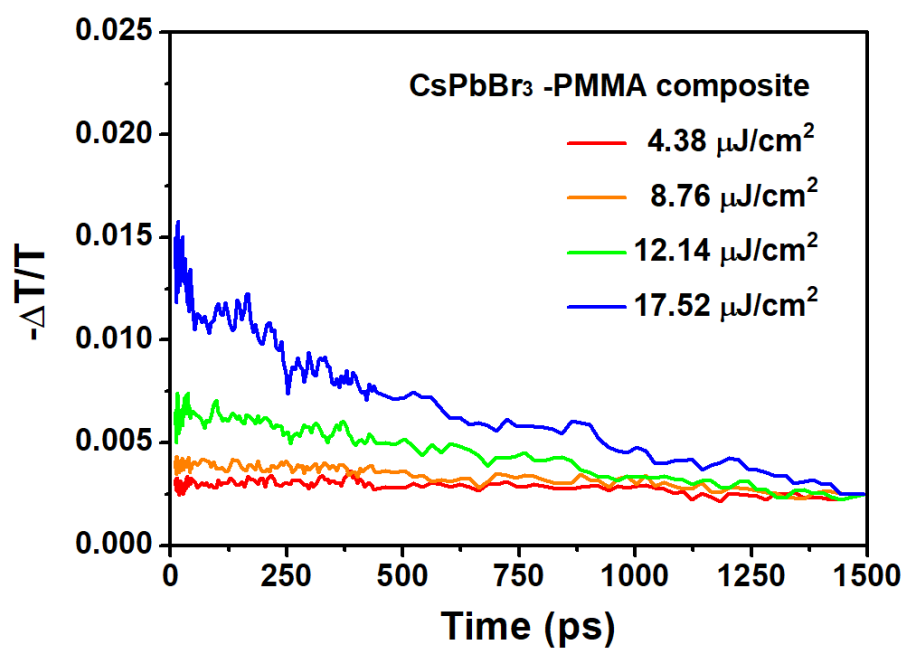

**Figure S16.** TA spectra of the resulted CsPbBr<sub>3</sub>-PMMA composite.



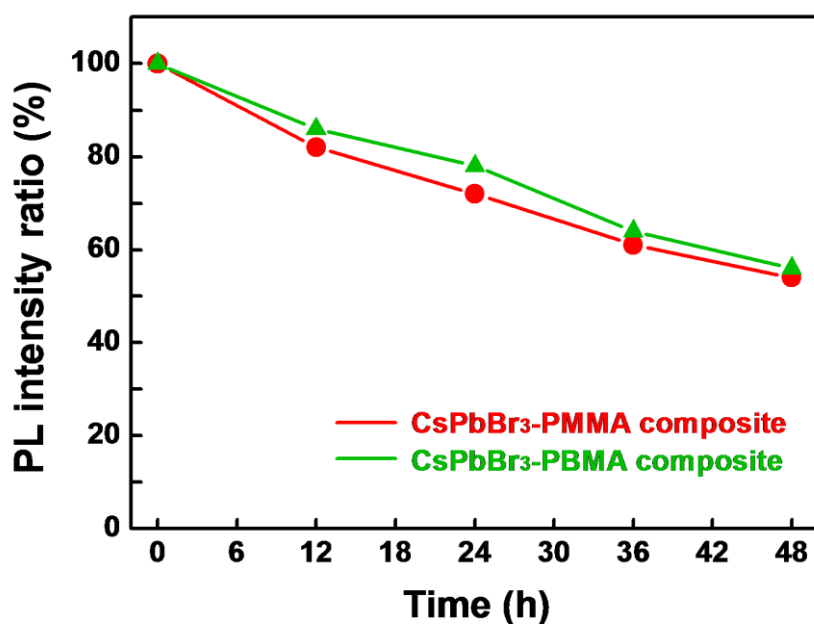

**Figure S17.** Time-dependent PL intensity of CsPbBr<sub>3</sub>-PMMA and CsPbBr<sub>3</sub>-PBMA composites in water.

**Table S7.** Photoluminescence quantum yields (PLQYs) of the resulted CsPbBr<sub>3</sub>-PMMA composite and MAPbBr<sub>3</sub>-PMMA composite before or after heated to 80 °C and kept at this temperature for 24 h in nitrogen atmosphere.

| PLQYs                                                  | Before heated | After heated |
|--------------------------------------------------------|---------------|--------------|
| The resulted<br>CsPbBr <sub>3</sub> -PMMA<br>composite | 62.4%         | 51.6%        |
| The resulted<br>MAPbBr <sub>3</sub> -PMMA<br>composite | 49.8%         | 46.5%        |

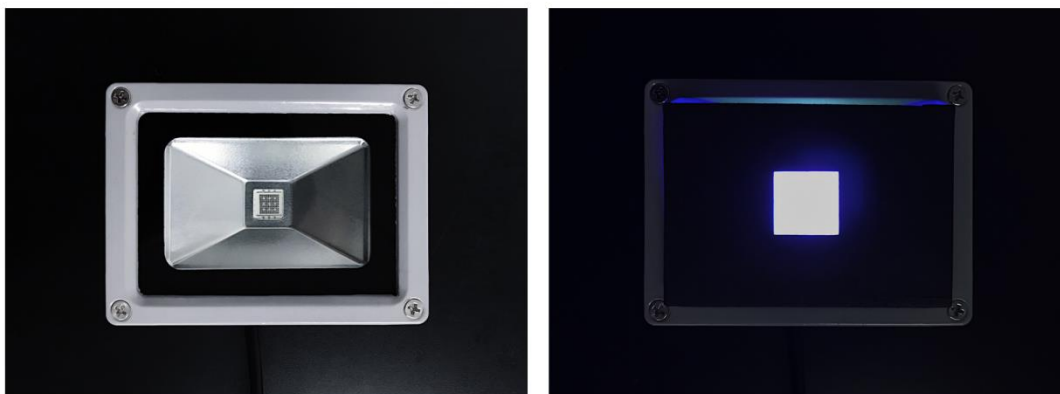

**Figure S18.** Photos are taken under ambient room light of blue LED (left) and white LED (right).

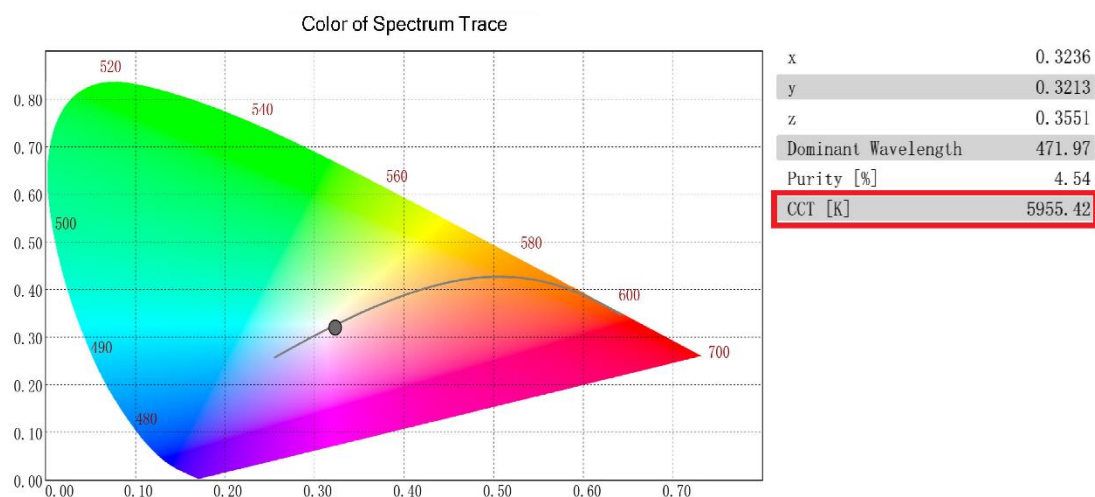

**Figure S19.** The color coordinates (gray dot) of obtained white LED in CIE diagram.

The color temperature (CCT) of the white LED was achieved at 5955.42 K.

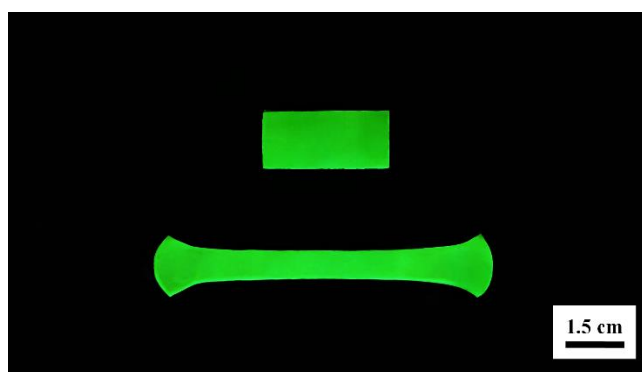

**Figure S20.** The photos of the resulted CsPbBr<sub>3</sub>-PBMA composite before (top) and after stretching (down) under UV-illumination.

**Table S8.** Photoluminescence quantum yields (PLQYs) of the resulted CsPbBr<sub>3</sub>-PMMA composite and the resulted CsPbBr<sub>3</sub>-PMMA composite with high content of CsPbBr<sub>3</sub> crystals.

| PLQYs                                            | Standard content of CsPbBr <sub>3</sub> crystals | High content of CsPbBr <sub>3</sub> crystals |
|--------------------------------------------------|--------------------------------------------------|----------------------------------------------|
| The resulted CsPbBr <sub>3</sub> -PMMA composite | 54.6%                                            | 43.5%                                        |

**Table S9.** Comparison of this work with other current correlative research.

| Emitter Type                              | PL <sub>max</sub><br>(nm) | Synthetic<br>condition <sup>a)</sup> | PLQY <sub>max</sub> in<br>polymer<br>matrix | Ref.         |
|-------------------------------------------|---------------------------|--------------------------------------|---------------------------------------------|--------------|
| CsPbBr <sub>3</sub> NCs                   | 521                       | Air; RT;<br>In bulk monomers         | 62.2%                                       | This<br>work |
| MAPbBr <sub>3-x</sub> Cl <sub>x</sub> NCs | 505                       | Air; RT;<br>DMF and toluene          | 56%                                         | [1]          |
| CsPbBr <sub>3</sub> NCs                   | 513                       | Ar; 120 °C; ODE                      | 53%                                         | [2]          |
| MAPbBr <sub>3</sub> NPs                   | 530                       | RT; DMF                              | 48%                                         | [3]          |
| FAPbBr <sub>3</sub> NPs                   | 530                       | Air; RT; DMF,<br>butanol and toluene | 30%                                         | [4]          |
| MAPbBr <sub>3</sub> NPs                   | 527                       | Air; 80 °C;<br>DMF and ODE           | 23%                                         | [5]          |
| MAPbBr <sub>3</sub><br>amorphous NPs      | 505                       | Air; RT;<br>butyrolactone and<br>DMF | 3.8%                                        | [6]          |

<sup>a)</sup> Synthetic condition include whether usage of insert gas ,the synthetic temperature and solvent.

**Abbreviations:** Argon atmosphere (Ar); methylammonium cation (MA); formamidinium (FA); nanocrystals (NCs); nanoparticles (NPs); room temperature (RT); octadecene (ODE); dimethyl formamide (DMF).

## References

- [1] Sun, H.; Yang, Z. Y.; Wei, M. Y.; Sun, W.; Li, X. Y.; Ye, S. Y.; Zhao, Y. B.; Tan, H. R.; Kynaston, E. L.; Schon, T. B.; Yan, H.; Lu, Z. H.; Ozin, G. A.; Sargent, E. H.; Seferos, D. S. Chemically Addressable Perovskite Nanocrystals for Light-Emitting Applications. *Adv. Mater.* **2017**, *29*, 17001153.
- [2] Meyns, M.; Peralvarez, M.; Heuer-Jungemann, A.; Hertog, W.; Ibanez, M.; Nafria, R.; Genc, A.; Arbiol, J.; Kovalenko, M. V.; Carreras, J.; Cabot, A.; Kanaras, A. G. Polymer-Enhanced Stability of Inorganic Perovskite Nanocrystals and Their Application in Color Conversion LEDs. *ACS Appl. Mat. Interfaces* **2016**, *8*, 19579-19586.
- [3] Wang, Y. N.; He, J.; Chen, H.; Chen, J. S.; Zhu, R. D.; Ma, P.; Towers, A.; Lin, Y.; Gesquiere, A. J.; Wu, S. T.; Dong, Y. J. Ultrastable, Highly Luminescent Organic-Inorganic Perovskite-Polymer Composite Films. *Adv. Mater.* **2016**, *28*, 10710-10717.
- [4] Perumal, A.; Shendre<sup>1</sup>, S.; Li, M.; Eugene Tay, Y. K.; Sharma, V. K.; Chen, S.; Wei, Z.; Liu, Q.; Gao, Y.; Buenconsejo, P. J. S.; Tan, S. T.; Gan, C. L.; Xiong, Q.; Sum, T. C.; Demir, H. V. Specific Cell Surface Labeling of GPCRs using Split GFP. *Sci. Reports*, **2016**, DOI: 10.1038/srep36733.
- [5] Schmidt, L. C.; Pertegas, A.; Gonzalez-Carrero, A.; Malinkiewicz, O.; Agouram, S.; Espallargas, G. M.; Bolink, H. J.; Galian, R. E.; Perez-Prieto, J. Nontemplate Synthesis of CH<sub>3</sub>NH<sub>3</sub>PbBr<sub>3</sub> Perovskite Nanoparticles. *J. Am. Chem. Soc.* **2014**, *136*, 850-853.
- [6] Xing, J.; Yan, F.; Zhao, Y.; Chen, S.; Yu, H.; Zhang, Q.; Zeng, R.; Demir, H. V.; Sun, X.; Huan, A.; Xiong, Q. High-Efficiency Light-Emitting Diodes of Organometal Halide Perovskite Amorphous Nanoparticles. *ACS Nano* **2016**, *10*, 6623-6630.
